# Supplementary material for: CaMKII oxidation is a critical performance/disease trade-off acquired at the dawn of vertebrate evolution
Source: PubMed Central journal article supplement (PMC8155201; doi:10.1038/s41467-021-23549-3), 2021-05-26
Supplement: 41467_2021_23549_MOESM3_ESM.pdf [file 41467_2021_23549_MOESM3_ESM.pdf]

### **Description of Additional Supplementary Files**

File Name: Supplementary Data 1

Description: List of candidate genes screened by RT-qPCR in MM and VV mouse mast cells, related to Fig. 4a.

File Name: Supplementary Data 2

Description: Sequence alignments underlying Supplementary Table 1.

File Name: Supplementary Data 3

Description: Primer validation data provided by Bio-Rad for custom designed PrimePCRTM assay plates for Fig. 4a.

File Name: Supplementary Movie 1

Description: Examples of categorical cardiac performance of flies.
